# Supplementary material for: Continuous impinging in a two-stage micromixer for the homogeneous growth of monodispersed ultrasmall Ni–Co oxides on graphene flakes with enhanced supercapacitive performance
Source: Royal Society of Chemistry journal article supplement (doi:10.1039/d1qm00268f), 2021-01-01
Supplement: d1qm00268f1.pdf [file d1qm00268f1.pdf]

## Supporting Information

### **Continuous impinging in a Two-stage Micromixer for the Homogeneous Growth of Monodispersed Ultrasmall Ni-Co Oxide on Graphene Flakes with Enhanced Supercapacitive Performance**

Junping Zhao,<sup>a</sup> Yechao Wu,<sup>a</sup> Yihuang Chen,<sup>a,b</sup> Huile Jin,<sup>a,b</sup> Shuang Pan,<sup>a</sup> Shiqiang Zhao,<sup>a</sup> Xin Feng,<sup>a,b</sup> Yahui Wang,<sup>a</sup> Qingcheng Zhang<sup>a,b\*</sup> and Shun Wang<sup>a,b\*</sup>

<sup>a</sup>College of Chemistry and Materials Engineering, Wenzhou University, Zhejiang 325035, China

<sup>b</sup>Institute of New Materials and Industrial Technology, Wenzhou University, Wenzhou, Zhejiang, China

\*Corresponding authors E-mail: [zhangqc@wzu.edu.cn](mailto:zhangqc@wzu.edu.cn), [shunwang@wzu.edu.cn](mailto:shunwang@wzu.edu.cn)

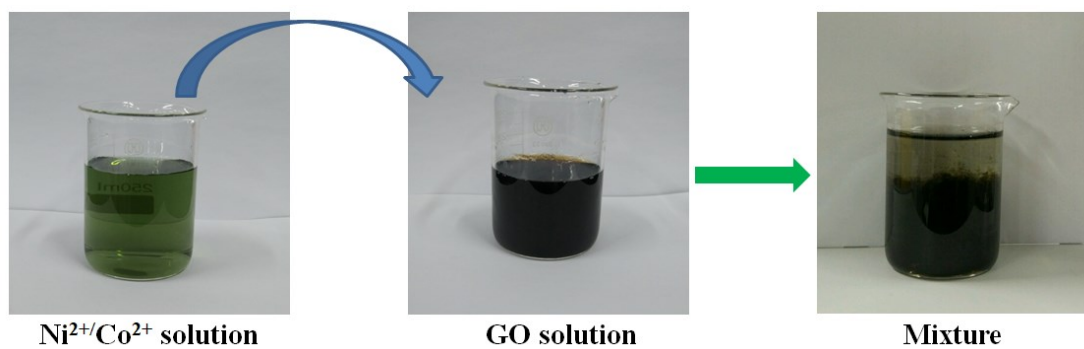

Fig. S1. The serious coagulation of Ni<sup>2+</sup>/Co<sup>2+</sup>/GO mixture.

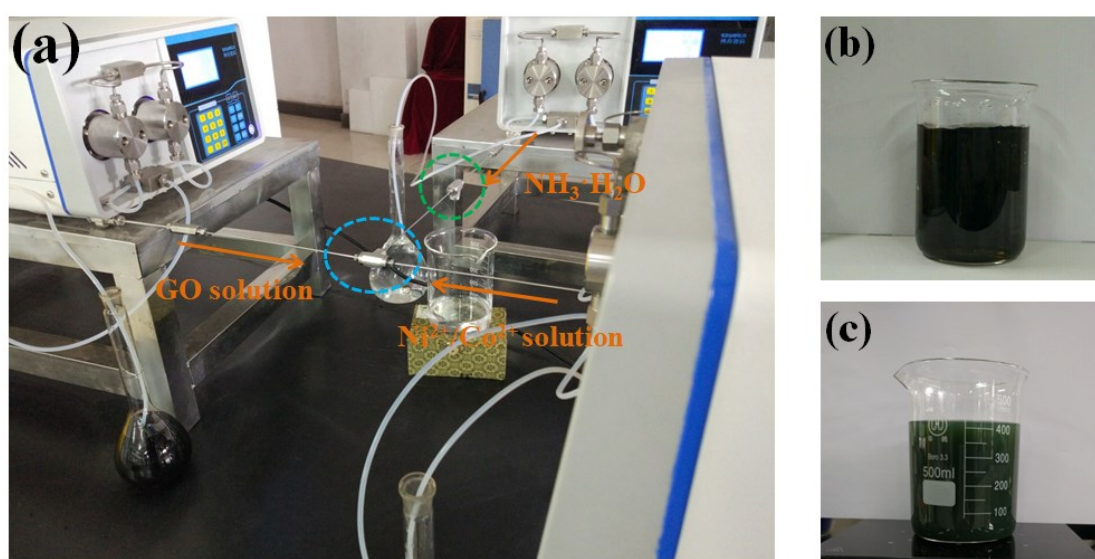

Fig. S2 (a) Synthesis of NCG-MM precursor in TS-MISR; (b) the homogeneous M<sup>2+</sup>/GO mixture from the first T-junction outlet; (c) the precipitate solution from the second T-junction outlet.



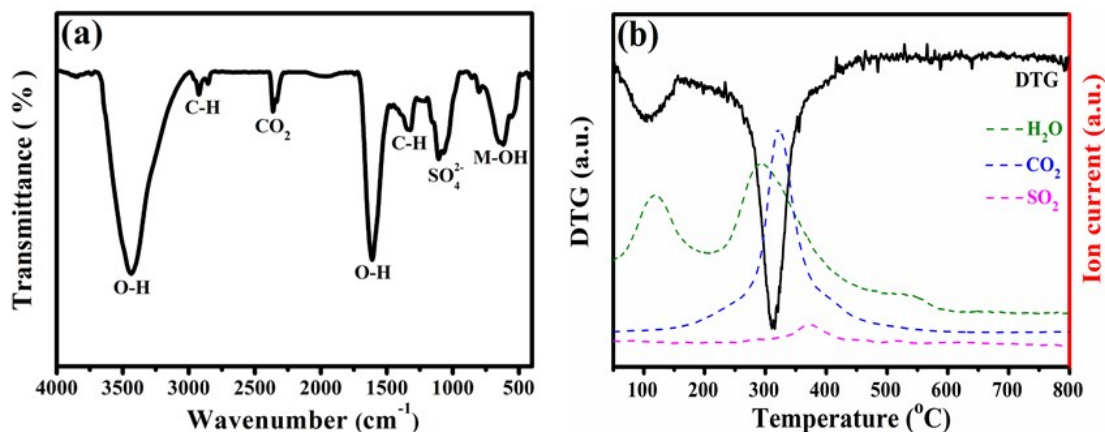

Fig. S4. (a) FT-IR spectrum and (b) TG-MS curves of NCG-MM precursor.

FT-IR technique was conducted to determine the molecular vibrations of anions presented in NCG-MM precursor, as shown in Fig. S4a. A broad band at around 3437 cm<sup>-1</sup> was ascribed to the O-H stretching vibration of water molecules or OH<sup>-</sup> groups presented in the framework layer to balance the positively charged Ni<sup>2+</sup>/Co<sup>2+</sup>, while the absorption band around 1630 cm<sup>-1</sup> was assigned to the O-H bending vibration of absorbed water molecules. Two distinct peaks appeared at around 2358 and 1107 cm<sup>-1</sup> suggested the existence of absorbed CO<sub>2</sub> and residual SO<sub>4</sub><sup>2-</sup> intercalated in the  $\alpha$ -phase Ni<sub>x</sub>Co<sub>y</sub>(OH)<sub>2</sub>/RGO framework layers, respectively.<sup>1</sup> In addition, the weak bands around 2923 and 1327 cm<sup>-1</sup> could be attributed to the C-H stretching vibration and C-H bending vibration of RGO flakes, respectively, while the characteristic bands in the region of 650-500 cm<sup>-1</sup> were originated from the M-OH (M=Ni/Co) vibrations.<sup>2</sup>

The thermal behavior of NCG-MM precursor was evaluated by thermogravimetric analysis coupled with mass spectrometry, as shown in Fig. S4b. The NCG-MM precursor underwent two endothermic peaks when processed upon heating in the Ar flow. The first desorption peak located at around 100 °C was mainly due to the coincident evolution of physically absorbed H<sub>2</sub>O and CO<sub>2</sub> in the

$\text{Ni}_x\text{Co}_y(\text{OH})_2/\text{RGO}$  structure, whereas the second weight loss appeared in the temperature range of 200–500 °C could be attributed to the pyrolysis of  $\text{Ni}_x\text{Co}_y(\text{OH})_2$  and labile oxygen-containing functional groups.<sup>3</sup> Therefore, some stable oxygen-containing functionalities that were not removed by *L*-ascorbic acid could be further eliminated under the thermal reduction. Besides, the evolution of  $\text{SO}_2$  at 380 °C was derived from the decomposition of intercalated  $\text{SO}_4^{2-}$ . Therefore, the NCG-MM precursor should be  $\text{SO}_4^{2-}$  intercalated  $\alpha\text{-Ni}_x\text{Co}_y(\text{OH})_2/\text{RGO}$  flakes.<sup>1</sup>

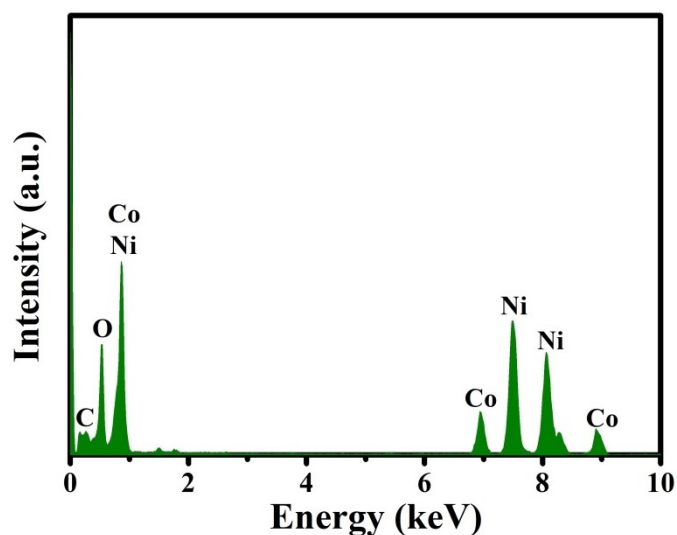

Fig. S5. EDS spectrum of NCG-MM

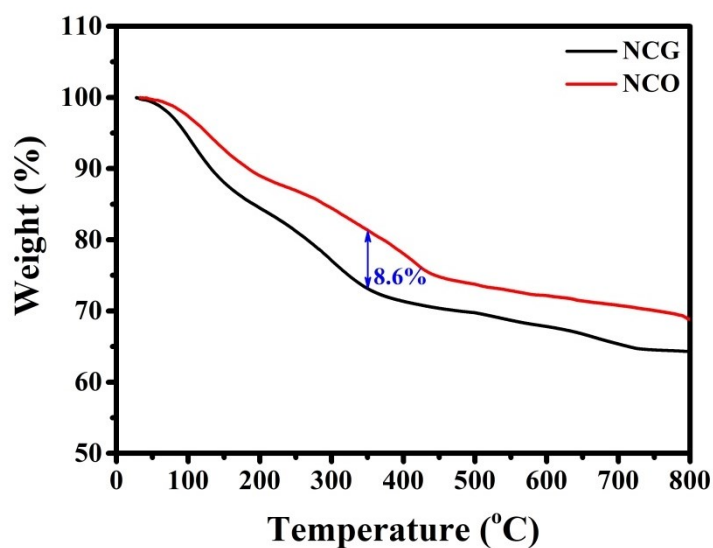

Fig. S6. TG curves of NCG and NCO treated in air

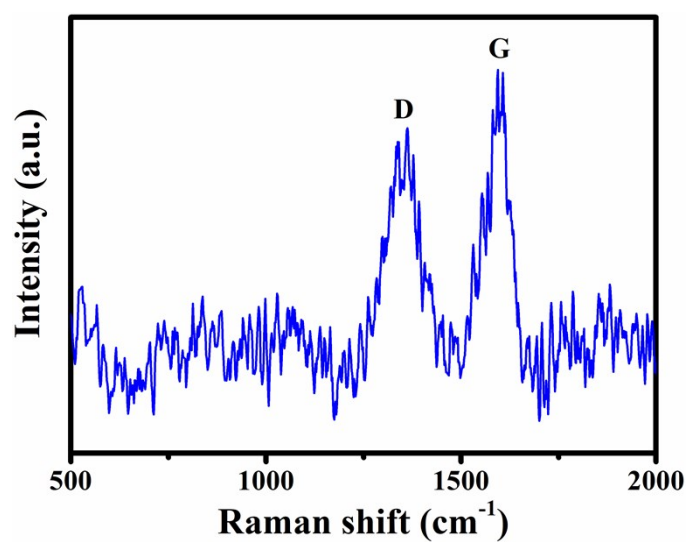

Fig. S7. Raman spectrum of Ni<sub>x</sub>Co<sub>y</sub>(OH)<sub>2</sub>/GO

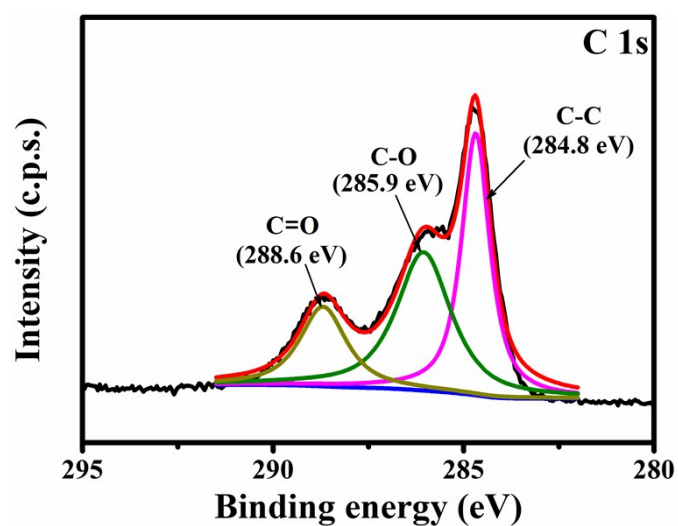

Fig. S8. High-resolution C 1s of Ni<sub>x</sub>Co<sub>y</sub>(OH)<sub>2</sub>/GO

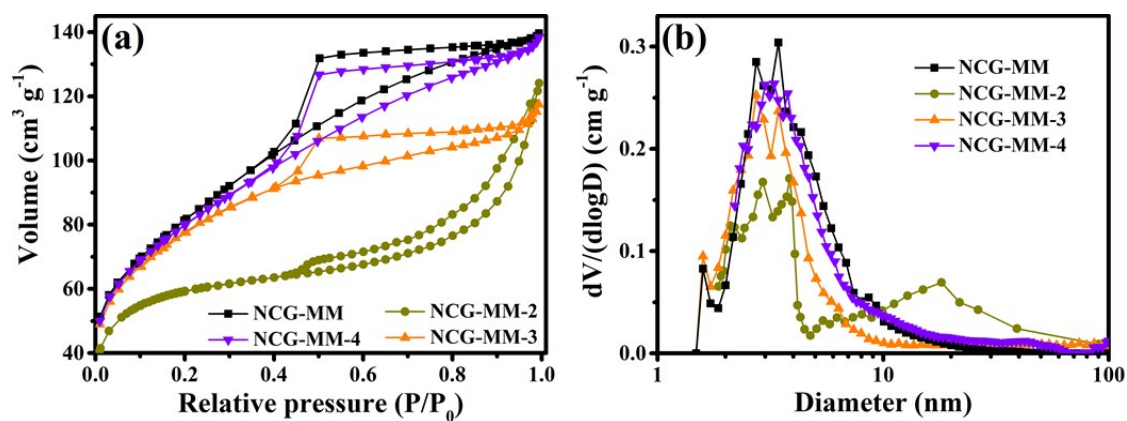

Fig. S9. (a) N<sub>2</sub> adsorption/desorption isotherms, (b) the particle size distribution of NCG composites synthesized at different volumetric flows in TS-MISR.

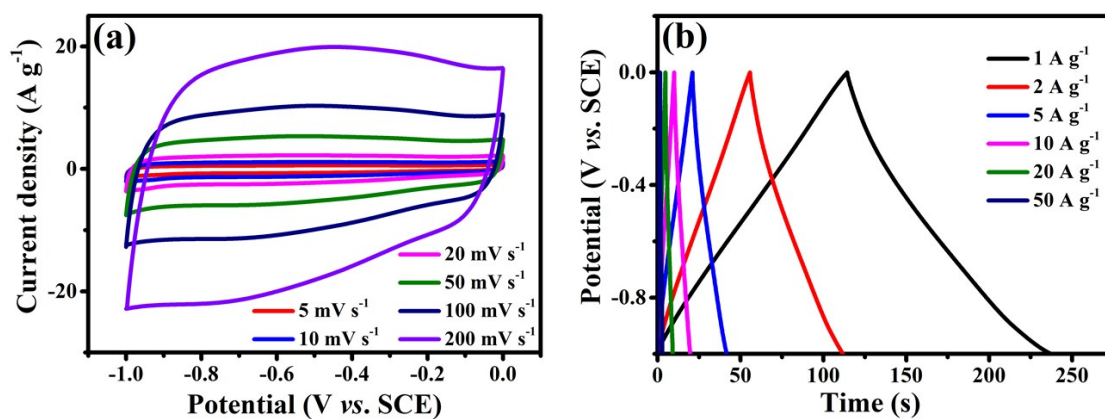

Fig. S10. (a) CV curves of RGO at various scan rates; (b) GCD curves of RGO at different current densities.

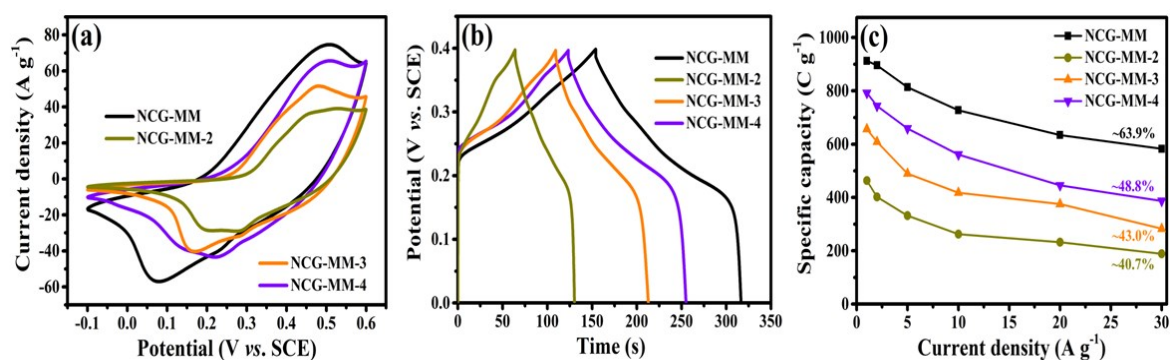

Fig. S11. (a) CV curves ( $50 \text{ mV s}^{-1}$ ), (b) GCD curves ( $5 \text{ A g}^{-1}$ ), (c) mass-specific capacitances of NCG composites synthesized at different  $V_A$  in TS-MISR.

Table S2. Comparison of the supercapacitive performances of Ni-Co-O/RGO synthesized in different methods

| Materials                                  | Synthetic methods                            | Specific capacitance (F g <sup>-1</sup> ) | Rate capability                   | Cycle Stability | Ref.         |
|--------------------------------------------|----------------------------------------------|-------------------------------------------|-----------------------------------|-----------------|--------------|
| NiCo <sub>2</sub> O <sub>4</sub> /graphene | electrodeposition                            | 1402 (1 A g <sup>-1</sup> )               | 77.0% (1→20 A g <sup>-1</sup> )   | 76.6% (5000)    | 4            |
| NiCo <sub>2</sub> O <sub>4</sub> /RGO      | electrodeposition                            | 1392 (1 A g <sup>-1</sup> )               | 64.5% (1→30 A g <sup>-1</sup> )   | 80.0% (3000)    | 5            |
| NiCo <sub>2</sub> O <sub>4</sub> /RGO      | hydrothermal                                 | 947.4 (0.5 A g <sup>-1</sup> )            | 76.6% (0.5→10 A g <sup>-1</sup> ) | 97.9% (3000)    | 6            |
| NiCo <sub>2</sub> O <sub>4</sub> /RGO      | hydrothermal                                 | 1003 (1 A g <sup>-1</sup> )               | 89.0% (1→10 A g <sup>-1</sup> )   | 57.0% (10000)   | 7            |
| NiCo <sub>2</sub> O <sub>4</sub> /graphene | hydrothermal                                 | 2300 (1 A g <sup>-1</sup> )               | 30.9% (1→20 A g <sup>-1</sup> )   | 92.1% (4000)    | 8            |
| NiCo <sub>2</sub> O <sub>4</sub> /N-RGO    | solvothermal                                 | 2090 (1 A g <sup>-1</sup> )               | 60.1% (1→10 A g <sup>-1</sup> )   | 96.2% (5000)    | 9            |
| NiCo <sub>2</sub> O <sub>4</sub> /RGO      | spray drying                                 | 971 (0.5 A g <sup>-1</sup> )              | 20.8% (0.5→20 A g <sup>-1</sup> ) | 76% (5000)      | 10           |
| NiCo <sub>2</sub> O <sub>4</sub> /3D RGO   | template-assisted                            | 708.4 (1 A g <sup>-1</sup> )              | 82.1% (1→16 A g <sup>-1</sup> )   | 94.3% (6000)    | 11           |
| NiO@Co <sub>3</sub> O <sub>4</sub><br>@RGO | MOF-derived                                  | 1361 (1 A g <sup>-1</sup> )               | 55.3% (1→30 A g <sup>-1</sup> )   | 76.4% (3000)    | 12           |
| NiCo <sub>2</sub> O <sub>4</sub> /RGO      | self- assembly                               | 1388 (0.5 A g <sup>-1</sup> )             | 60.5% (0.5→30 A g <sup>-1</sup> ) | 90.2% (20000)   | 13           |
| NiMoO <sub>4</sub> /RGO                    | Microwave<br>-assisted                       | 1274 (1 A g <sup>-1</sup> )               | 44.9% (1→10 A g <sup>-1</sup> )   | 81.1% (1000)    | 14           |
| NiCo <sub>2</sub> O <sub>4</sub> /RGO      | self-combustion                              | 1019 (1 A g <sup>-1</sup> )               | 66.1% (1→20 A g <sup>-1</sup> )   | 94.0% (2000)    | 15           |
| Ni-Co-O/RGO                                | template-assistant<br>precipitation<br>(STR) | 1211.2 (1 A g <sup>-1</sup> )             | 56.7% (1→10 A g <sup>-1</sup> )   | 90.5% (2000)    | 16           |
| Ni-Co-O/RGO                                | precipitation (TS-<br>MISR)                  | 2281 (1 A g <sup>-1</sup> )               | 63.9% (1→30 A g <sup>-1</sup> )   | 94.3% (5000)    | this<br>work |



## References

- 1 F. Wang, X. Liu, F. Chen, H. Wan, Y. Lin, N. Zhang and R. Ma, Advanced supercapacitors based on  $\alpha$ -Ni(OH)<sub>2</sub> nanoplates/graphene composite electrodes with high energy and power density, *ACS Appl. Energy Mater.*, 2018, **1**, 1496-1505.
- 2 J. Yang, C. Yu, C. Hu, M. Wang, S. Li, H. Huang, K. Bustillo, X. Han, C. Zhao, W. Guo, Z. Zeng, H. Zheng and J. Qiu, Surface-confined fabrication of ultrathin nickel cobalt-layered double hydroxide nanosheets for high-performance supercapacitors, *Adv. Funct. Mater.*, 2018, **28**, 1803272.
- 3 R. Larciprete, S. Fabris, T. Sun, P. Lacovig, A. Baraldi and S. Lizzit, Dual path mechanism in the thermal reduction of graphene oxide, *J. Am. Chem. Soc.*, 2011, **133**, 17315-17321.
- 4 Kuila, Tapas, Kim, N. Hoon, Lee, S. Hee, Zhang, Chunfei and J. Hee, Facile preparation of flower-like NiCo<sub>2</sub>O<sub>4</sub>/three dimensional graphene foam hybrid for high performance supercapacitor electrodes, *Carbon*, 2015, **89**, 328-339.
- 5 A. Rashti, B. Wang, E. Hassani, F. Feyzbar-Khalkhali-Nejad and T. S. Oh, Electrophoretic deposition of nickel cobaltite/polyaniline/rGO composite electrode for high-performance all-solid-state asymmetric supercapacitors, *Energy Fuels*, 2020, **34**, 6448-6461.
- 6 L. Ma, X. Shen, H. Zhou, Z. Ji, K. Chen and G. Zhu, High performance supercapacitor electrode materials based on porous NiCo<sub>2</sub>O<sub>4</sub> hexagonal nanoplates/reduced graphene oxide composites, *Chem. Eng. J.*, 2015, **262**, 980-988.
- 7 S. Zhang, H. Gao, J. Zhou, F. Jiang and Z. Zhang, Hydrothermal synthesis of reduced graphene oxide-modified NiCo<sub>2</sub>O<sub>4</sub> nanowire arrays with enhanced reactivity for supercapacitors, *J. Alloys Compd.*, 2019, **792**, 474-480.
- 8 S. Sun, S. Wang, S. Li, Y. Li, Y. Zhang, J. Chen, Z. Zhang, S. Fang and P. Wang, Asymmetric supercapacitors based on a NiCo<sub>2</sub>O<sub>4</sub>/three dimensional graphene composite and three dimensional graphene with high energy density, *J. Mater. Chem. A*, 2016, **4**, 18646-18653.
- 9 C. Huang, Y. Ding, C. Hao, S. Zhou, X. Wang, H. Gao, L. Zhu and J. Wu, PVP-assisted growth of Ni-Co oxide on N-doped reduced graphene oxide with enhanced pseudocapacitive behavior, *Chem. Eng. J.*, 2019, **378**, 122202.
- 10 A. Mondal, S. Maiti, S. Mahanty and A. Baran Panda, Large-scale synthesis of porous NiCo<sub>2</sub>O<sub>4</sub> and rGO-NiCo<sub>2</sub>O<sub>4</sub> hollow-spheres with superior electrochemical performance as a faradaic electrode, *J. Mater. Chem. A*, 2017, **5**, 16854-16864.
- 11 Y. Zhou, Z. Huang, H. Liao, J. Li, H. Wang and Y. Wang, 3D porous graphene/NiCo<sub>2</sub>O<sub>4</sub> hybrid film as an advanced electrode for supercapacitors, *Appl. Surf. Sci.*, 2020, **534**, 147598.
- 12 X. Yin, C. Zhi, W. Sun, L.-P. Lv and Y. Wang, Multilayer NiO@Co<sub>3</sub>O<sub>4</sub>@graphene quantum dots hollow spheres for high-performance lithium-ion batteries and supercapacitors, *J. Mater. Chem. A*, 2019, **7**, 7800-7814.
- 13 Q. Li, C. Lu, C. Chen, L. Xie, Y. Liu, Y. Li, Q. Kong and H. Wang, Layered NiCo<sub>2</sub>O<sub>4</sub>/reduced graphene oxide composite as an advanced electrode for supercapacitor, *Energy Storage Mater.*, 2017, **8**, 59-67.
- 14 T. Liu, H. Chai, D. Jia, Y. Su, T. Wang and W. Zhou, Rapid microwave-assisted synthesis of mesoporous NiMoO<sub>4</sub> nanorod/reduced graphene oxide composites for high-performance supercapacitors, *Electrochim. Acta*, 2015, **180**, 998-1006.
- 15 A. N. Naveen and S. Selladurai, Novel low temperature synthesis and electrochemical

characterization of mesoporous nickel cobaltite-reduced graphene oxide (RGO) composite for supercapacitor application, *Electrochim. Acta*, 2015, **173**, 290-301.

- 16 Y. Xu, L. Wang, P. Cao, C. Cai, Y. Fu and X. Ma, Mesoporous composite nickel cobalt oxide/graphene oxide synthesized via a template-assistant co-precipitation route as electrode material for supercapacitors, *J. Power Sources*, 2016, **306**, 742-752.
